# Erratum: Evaluating hydrodynamical simulations with green valley galaxies

by J. Anghopo,<sup>1</sup>★ A. Negri<sup>2,3</sup>, I. Ferreras<sup>2,3,4</sup>, I. G. de la Rosa,<sup>2,3</sup> C. Dalla Vecchia<sup>2,3</sup> and A. Pillepich<sup>5</sup>

<sup>1</sup>Mullard Space Science Laboratory, University College London, Holmbury St Mary, Dorking, Surrey RH5 6NT, UK

<sup>2</sup>Instituto de Astrofísica de Canarias, Calle Vía Láctea s/n, E-38205 La Laguna, Tenerife, Spain

<sup>3</sup>Departamento de Astrofísica, Universidad de La Laguna (ULL), E-38206 La Laguna, Tenerife, Spain

<sup>4</sup>Department of Physics and Astronomy, University College London, Gower Street, London WC1E 6BT, UK

<sup>5</sup>Max-Planck-Institut für Astronomie, Königstuhl 17, D-69117 Heidelberg, Germany

**Key words:** errata, addenda – galaxies: evolution – galaxies: formation – galaxies: interactions – galaxies: stellar content.

In the originally published version of this manuscript, we discovered an error in the way specific star formation rates (sSFR) were calculated, mixing estimates for the total stellar mass with the star formation rate measured within the 3 kpc fiducial aperture. The amended version correctly defines the sSFR within the 3 kpc aperture. The update changes table 2, thus marginally changing figs 3, 4, and 8 (in the latter we decided to only show the quiescent fraction to avoid

crowding, making the figure easier to interpret). Please note the scientific implications have not changed our conclusions: although we find that the simulations (both EAGLE and IllustrisTNG) now better match the observational constraints, we still find strong evidence that suggests over-quenching in the simulations.

This paper has been typeset from a Microsoft Word file prepared by the author.

\* E-mail: [james.angthopo.16@ucl.ac.uk](mailto:james.angthopo.16@ucl.ac.uk)
